# Supplementary material for: Deep Phylogenetic Analysis of Haplogroup G1 Provides Estimates of SNP and STR Mutation Rates on the Human Y-Chromosome and Reveals Migrations of Iranic Speakers
Source: PLoS One. 2015 Apr 7;10(4):e0122968. doi: 10.1371/journal.pone.0122968 (PMC4388827; doi:10.1371/journal.pone.0122968)
Supplement: S2 Fig — The tree is based on the high quality filtered dataset from this study consisting of 20 samples and 636 SNPs. The Build 37 coordinates of the SNPs are shown along branches. ISOGG marker names are shown in red. Further details of these mutations are reported in S4 Table. (PDF) [file pone.0122968.s003.pdf]

| G1-GG313 |  |  |  |  |  |  |  |  |  | G1-L1324         |  |  |  |  |  |  |  |  |  | G1-L1327         |  |  |  |  |  |  |  |  |  | G1-L1328         |  |  |  |  |  |  |  |  |  |
|----------|--|--|--|--|--|--|--|--|--|------------------|--|--|--|--|--|--|--|--|--|------------------|--|--|--|--|--|--|--|--|--|------------------|--|--|--|--|--|--|--|--|--|
| 8864740  |  |  |  |  |  |  |  |  |  | 2710308 16972    |  |  |  |  |  |  |  |  |  | 2710308 16972    |  |  |  |  |  |  |  |  |  | 2710308 16972    |  |  |  |  |  |  |  |  |  |
| 890877   |  |  |  |  |  |  |  |  |  | 6931091          |  |  |  |  |  |  |  |  |  | 6931091          |  |  |  |  |  |  |  |  |  | 6931091          |  |  |  |  |  |  |  |  |  |
| 13239334 |  |  |  |  |  |  |  |  |  | 7087221          |  |  |  |  |  |  |  |  |  | 7087221          |  |  |  |  |  |  |  |  |  | 7087221          |  |  |  |  |  |  |  |  |  |
| 13669993 |  |  |  |  |  |  |  |  |  | 7528631          |  |  |  |  |  |  |  |  |  | 7528631          |  |  |  |  |  |  |  |  |  | 7528631          |  |  |  |  |  |  |  |  |  |
| 14115538 |  |  |  |  |  |  |  |  |  | 7884469          |  |  |  |  |  |  |  |  |  | 7884469          |  |  |  |  |  |  |  |  |  | 7884469          |  |  |  |  |  |  |  |  |  |
| 14876637 |  |  |  |  |  |  |  |  |  | 7884767          |  |  |  |  |  |  |  |  |  | 7884767          |  |  |  |  |  |  |  |  |  | 7884767          |  |  |  |  |  |  |  |  |  |
| 17200736 |  |  |  |  |  |  |  |  |  | 8207679          |  |  |  |  |  |  |  |  |  | 8207679          |  |  |  |  |  |  |  |  |  | 8207679          |  |  |  |  |  |  |  |  |  |
| 17935441 |  |  |  |  |  |  |  |  |  | 8227479          |  |  |  |  |  |  |  |  |  | 8227479          |  |  |  |  |  |  |  |  |  | 8227479          |  |  |  |  |  |  |  |  |  |
| 18385111 |  |  |  |  |  |  |  |  |  | 8388191          |  |  |  |  |  |  |  |  |  | 8388191          |  |  |  |  |  |  |  |  |  | 8388191          |  |  |  |  |  |  |  |  |  |
| 18814484 |  |  |  |  |  |  |  |  |  | 8398030          |  |  |  |  |  |  |  |  |  | 8398030          |  |  |  |  |  |  |  |  |  | 8398030          |  |  |  |  |  |  |  |  |  |
| 19338322 |  |  |  |  |  |  |  |  |  | 8455481          |  |  |  |  |  |  |  |  |  | 8455481          |  |  |  |  |  |  |  |  |  | 8455481          |  |  |  |  |  |  |  |  |  |
| 21266986 |  |  |  |  |  |  |  |  |  | 8483661 L1324    |  |  |  |  |  |  |  |  |  | 8483661 L1324    |  |  |  |  |  |  |  |  |  | 8483661 L1324    |  |  |  |  |  |  |  |  |  |
| 22667649 |  |  |  |  |  |  |  |  |  | 8535384          |  |  |  |  |  |  |  |  |  | 8535384          |  |  |  |  |  |  |  |  |  | 8535384          |  |  |  |  |  |  |  |  |  |
| 22615524 |  |  |  |  |  |  |  |  |  | 8654619          |  |  |  |  |  |  |  |  |  | 8654619          |  |  |  |  |  |  |  |  |  | 8654619          |  |  |  |  |  |  |  |  |  |
| 23166817 |  |  |  |  |  |  |  |  |  | 9060175          |  |  |  |  |  |  |  |  |  | 9060175          |  |  |  |  |  |  |  |  |  | 9060175          |  |  |  |  |  |  |  |  |  |
| 24881159 |  |  |  |  |  |  |  |  |  | 9067021          |  |  |  |  |  |  |  |  |  | 9067021          |  |  |  |  |  |  |  |  |  | 9067021          |  |  |  |  |  |  |  |  |  |
|          |  |  |  |  |  |  |  |  |  | 9099288          |  |  |  |  |  |  |  |  |  | 9099288          |  |  |  |  |  |  |  |  |  | 9099288          |  |  |  |  |  |  |  |  |  |
|          |  |  |  |  |  |  |  |  |  | 9378286          |  |  |  |  |  |  |  |  |  | 9378286          |  |  |  |  |  |  |  |  |  | 9378286          |  |  |  |  |  |  |  |  |  |
|          |  |  |  |  |  |  |  |  |  | 9621317          |  |  |  |  |  |  |  |  |  | 9621317          |  |  |  |  |  |  |  |  |  | 9621317          |  |  |  |  |  |  |  |  |  |
|          |  |  |  |  |  |  |  |  |  | 9833468          |  |  |  |  |  |  |  |  |  | 9833468          |  |  |  |  |  |  |  |  |  | 9833468          |  |  |  |  |  |  |  |  |  |
|          |  |  |  |  |  |  |  |  |  | 9897968          |  |  |  |  |  |  |  |  |  | 9897968          |  |  |  |  |  |  |  |  |  | 9897968          |  |  |  |  |  |  |  |  |  |
|          |  |  |  |  |  |  |  |  |  | 13682659         |  |  |  |  |  |  |  |  |  | 13682659         |  |  |  |  |  |  |  |  |  | 13682659         |  |  |  |  |  |  |  |  |  |
|          |  |  |  |  |  |  |  |  |  | 14048502         |  |  |  |  |  |  |  |  |  | 14048502         |  |  |  |  |  |  |  |  |  | 14048502         |  |  |  |  |  |  |  |  |  |
|          |  |  |  |  |  |  |  |  |  | 14651085         |  |  |  |  |  |  |  |  |  | 14651085         |  |  |  |  |  |  |  |  |  | 14651085         |  |  |  |  |  |  |  |  |  |
|          |  |  |  |  |  |  |  |  |  | 14938655         |  |  |  |  |  |  |  |  |  | 14938655         |  |  |  |  |  |  |  |  |  | 14938655         |  |  |  |  |  |  |  |  |  |
|          |  |  |  |  |  |  |  |  |  | 15022262         |  |  |  |  |  |  |  |  |  | 15022262         |  |  |  |  |  |  |  |  |  | 15022262         |  |  |  |  |  |  |  |  |  |
|          |  |  |  |  |  |  |  |  |  | 1509990          |  |  |  |  |  |  |  |  |  | 1509990          |  |  |  |  |  |  |  |  |  | 1509990          |  |  |  |  |  |  |  |  |  |
|          |  |  |  |  |  |  |  |  |  | 15318025         |  |  |  |  |  |  |  |  |  | 15318025         |  |  |  |  |  |  |  |  |  | 15318025         |  |  |  |  |  |  |  |  |  |
|          |  |  |  |  |  |  |  |  |  | 15452079         |  |  |  |  |  |  |  |  |  | 15452079         |  |  |  |  |  |  |  |  |  | 15452079         |  |  |  |  |  |  |  |  |  |
|          |  |  |  |  |  |  |  |  |  | 15702306         |  |  |  |  |  |  |  |  |  | 15702306         |  |  |  |  |  |  |  |  |  | 15702306         |  |  |  |  |  |  |  |  |  |
|          |  |  |  |  |  |  |  |  |  | 15890952         |  |  |  |  |  |  |  |  |  | 15890952         |  |  |  |  |  |  |  |  |  | 15890952         |  |  |  |  |  |  |  |  |  |
|          |  |  |  |  |  |  |  |  |  | 1592982          |  |  |  |  |  |  |  |  |  | 1592982          |  |  |  |  |  |  |  |  |  | 1592982          |  |  |  |  |  |  |  |  |  |
|          |  |  |  |  |  |  |  |  |  | 1607939          |  |  |  |  |  |  |  |  |  | 1607939          |  |  |  |  |  |  |  |  |  | 1607939          |  |  |  |  |  |  |  |  |  |
|          |  |  |  |  |  |  |  |  |  | 1627724          |  |  |  |  |  |  |  |  |  | 1627724          |  |  |  |  |  |  |  |  |  | 1627724          |  |  |  |  |  |  |  |  |  |
|          |  |  |  |  |  |  |  |  |  | 16442906         |  |  |  |  |  |  |  |  |  | 16442906         |  |  |  |  |  |  |  |  |  | 16442906         |  |  |  |  |  |  |  |  |  |
|          |  |  |  |  |  |  |  |  |  | 16937216         |  |  |  |  |  |  |  |  |  | 16937216         |  |  |  |  |  |  |  |  |  | 16937216         |  |  |  |  |  |  |  |  |  |
|          |  |  |  |  |  |  |  |  |  | 17442226         |  |  |  |  |  |  |  |  |  | 17442226         |  |  |  |  |  |  |  |  |  | 17442226         |  |  |  |  |  |  |  |  |  |
|          |  |  |  |  |  |  |  |  |  | 1780244          |  |  |  |  |  |  |  |  |  | 1780244          |  |  |  |  |  |  |  |  |  | 1780244          |  |  |  |  |  |  |  |  |  |
|          |  |  |  |  |  |  |  |  |  | 17840001         |  |  |  |  |  |  |  |  |  | 17840001         |  |  |  |  |  |  |  |  |  | 17840001         |  |  |  |  |  |  |  |  |  |
|          |  |  |  |  |  |  |  |  |  | 17877992 Y2614   |  |  |  |  |  |  |  |  |  | 17877992 Y2614   |  |  |  |  |  |  |  |  |  | 17877992 Y2614   |  |  |  |  |  |  |  |  |  |
|          |  |  |  |  |  |  |  |  |  | 17893966         |  |  |  |  |  |  |  |  |  | 17893966         |  |  |  |  |  |  |  |  |  | 17893966         |  |  |  |  |  |  |  |  |  |
|          |  |  |  |  |  |  |  |  |  | 18786729         |  |  |  |  |  |  |  |  |  | 18786729         |  |  |  |  |  |  |  |  |  | 18786729         |  |  |  |  |  |  |  |  |  |
|          |  |  |  |  |  |  |  |  |  | 18933065         |  |  |  |  |  |  |  |  |  | 18933065         |  |  |  |  |  |  |  |  |  | 18933065         |  |  |  |  |  |  |  |  |  |
|          |  |  |  |  |  |  |  |  |  | 19086396         |  |  |  |  |  |  |  |  |  | 19086396         |  |  |  |  |  |  |  |  |  | 19086396         |  |  |  |  |  |  |  |  |  |
|          |  |  |  |  |  |  |  |  |  | 19208781         |  |  |  |  |  |  |  |  |  | 19208781         |  |  |  |  |  |  |  |  |  | 19208781         |  |  |  |  |  |  |  |  |  |
|          |  |  |  |  |  |  |  |  |  | 19404594         |  |  |  |  |  |  |  |  |  | 19404594         |  |  |  |  |  |  |  |  |  | 19404594         |  |  |  |  |  |  |  |  |  |
|          |  |  |  |  |  |  |  |  |  | 20813298         |  |  |  |  |  |  |  |  |  | 20813298         |  |  |  |  |  |  |  |  |  | 20813298         |  |  |  |  |  |  |  |  |  |
|          |  |  |  |  |  |  |  |  |  | 21264825         |  |  |  |  |  |  |  |  |  | 21264825         |  |  |  |  |  |  |  |  |  | 21264825         |  |  |  |  |  |  |  |  |  |
|          |  |  |  |  |  |  |  |  |  | 21396002         |  |  |  |  |  |  |  |  |  | 21396002         |  |  |  |  |  |  |  |  |  | 21396002         |  |  |  |  |  |  |  |  |  |
|          |  |  |  |  |  |  |  |  |  | 21559792         |  |  |  |  |  |  |  |  |  | 21559792         |  |  |  |  |  |  |  |  |  | 21559792         |  |  |  |  |  |  |  |  |  |
|          |  |  |  |  |  |  |  |  |  | 218285978        |  |  |  |  |  |  |  |  |  | 218285978        |  |  |  |  |  |  |  |  |  | 218285978        |  |  |  |  |  |  |  |  |  |
|          |  |  |  |  |  |  |  |  |  | 21846118         |  |  |  |  |  |  |  |  |  | 21846118         |  |  |  |  |  |  |  |  |  | 21846118         |  |  |  |  |  |  |  |  |  |
|          |  |  |  |  |  |  |  |  |  | 22478134         |  |  |  |  |  |  |  |  |  | 22478134         |  |  |  |  |  |  |  |  |  | 22478134         |  |  |  |  |  |  |  |  |  |
|          |  |  |  |  |  |  |  |  |  | 23057151         |  |  |  |  |  |  |  |  |  | 23057151         |  |  |  |  |  |  |  |  |  | 23057151         |  |  |  |  |  |  |  |  |  |
|          |  |  |  |  |  |  |  |  |  | 22866536         |  |  |  |  |  |  |  |  |  | 22866536         |  |  |  |  |  |  |  |  |  | 22866536         |  |  |  |  |  |  |  |  |  |
|          |  |  |  |  |  |  |  |  |  | 22454358         |  |  |  |  |  |  |  |  |  | 22454358         |  |  |  |  |  |  |  |  |  | 22454358         |  |  |  |  |  |  |  |  |  |
|          |  |  |  |  |  |  |  |  |  | 23159178         |  |  |  |  |  |  |  |  |  | 23159178         |  |  |  |  |  |  |  |  |  | 23159178         |  |  |  |  |  |  |  |  |  |
|          |  |  |  |  |  |  |  |  |  | 23196000         |  |  |  |  |  |  |  |  |  | 23196000         |  |  |  |  |  |  |  |  |  | 23196000         |  |  |  |  |  |  |  |  |  |
|          |  |  |  |  |  |  |  |  |  | 21606660         |  |  |  |  |  |  |  |  |  | 21606660         |  |  |  |  |  |  |  |  |  | 21606660         |  |  |  |  |  |  |  |  |  |
|          |  |  |  |  |  |  |  |  |  | 21718058         |  |  |  |  |  |  |  |  |  | 21718058         |  |  |  |  |  |  |  |  |  | 21718058         |  |  |  |  |  |  |  |  |  |
|          |  |  |  |  |  |  |  |  |  | 23491566         |  |  |  |  |  |  |  |  |  | 23491566         |  |  |  |  |  |  |  |  |  | 23491566         |  |  |  |  |  |  |  |  |  |
|          |  |  |  |  |  |  |  |  |  | 23804093         |  |  |  |  |  |  |  |  |  | 23804093         |  |  |  |  |  |  |  |  |  | 23804093         |  |  |  |  |  |  |  |  |  |
|          |  |  |  |  |  |  |  |  |  | 23967738         |  |  |  |  |  |  |  |  |  | 23967738         |  |  |  |  |  |  |  |  |  | 23967738         |  |  |  |  |  |  |  |  |  |
|          |  |  |  |  |  |  |  |  |  | 17270965         |  |  |  |  |  |  |  |  |  | 17270965         |  |  |  |  |  |  |  |  |  | 17270965         |  |  |  |  |  |  |  |  |  |
|          |  |  |  |  |  |  |  |  |  | 6016198          |  |  |  |  |  |  |  |  |  | 6016198          |  |  |  |  |  |  |  |  |  | 6016198          |  |  |  |  |  |  |  |  |  |
|          |  |  |  |  |  |  |  |  |  | 7295263          |  |  |  |  |  |  |  |  |  | 7295263          |  |  |  |  |  |  |  |  |  | 7295263          |  |  |  |  |  |  |  |  |  |
|          |  |  |  |  |  |  |  |  |  | 15339800         |  |  |  |  |  |  |  |  |  | 15339800         |  |  |  |  |  |  |  |  |  | 15339800         |  |  |  |  |  |  |  |  |  |
|          |  |  |  |  |  |  |  |  |  | 19523871         |  |  |  |  |  |  |  |  |  | 19523871         |  |  |  |  |  |  |  |  |  | 19523871         |  |  |  |  |  |  |  |  |  |
|          |  |  |  |  |  |  |  |  |  | 140051600        |  |  |  |  |  |  |  |  |  | 140051600        |  |  |  |  |  |  |  |  |  | 140051600        |  |  |  |  |  |  |  |  |  |
|          |  |  |  |  |  |  |  |  |  | 18016591         |  |  |  |  |  |  |  |  |  | 18016591         |  |  |  |  |  |  |  |  |  | 18016591         |  |  |  |  |  |  |  |  |  |
|          |  |  |  |  |  |  |  |  |  | 22080372         |  |  |  |  |  |  |  |  |  | 22080372         |  |  |  |  |  |  |  |  |  | 22080372         |  |  |  |  |  |  |  |  |  |
|          |  |  |  |  |  |  |  |  |  | 22089231         |  |  |  |  |  |  |  |  |  | 22089231         |  |  |  |  |  |  |  |  |  | 22089231         |  |  |  |  |  |  |  |  |  |
|          |  |  |  |  |  |  |  |  |  | 18809904         |  |  |  |  |  |  |  |  |  | 18809904         |  |  |  |  |  |  |  |  |  | 18809904         |  |  |  |  |  |  |  |  |  |
|          |  |  |  |  |  |  |  |  |  | 23385584 M5532   |  |  |  |  |  |  |  |  |  | 23385584 M5532   |  |  |  |  |  |  |  |  |  | 23385584 M5532   |  |  |  |  |  |  |  |  |  |
|          |  |  |  |  |  |  |  |  |  | 24805043         |  |  |  |  |  |  |  |  |  | 24805043         |  |  |  |  |  |  |  |  |  | 24805043         |  |  |  |  |  |  |  |  |  |
|          |  |  |  |  |  |  |  |  |  | 22407796         |  |  |  |  |  |  |  |  |  | 22407796         |  |  |  |  |  |  |  |  |  | 22407796         |  |  |  |  |  |  |  |  |  |
|          |  |  |  |  |  |  |  |  |  | 2065759          |  |  |  |  |  |  |  |  |  | 2065759          |  |  |  |  |  |  |  |  |  | 2065759          |  |  |  |  |  |  |  |  |  |
|          |  |  |  |  |  |  |  |  |  | 22043443         |  |  |  |  |  |  |  |  |  | 22043443         |  |  |  |  |  |  |  |  |  | 22043443         |  |  |  |  |  |  |  |  |  |
|          |  |  |  |  |  |  |  |  |  | 23075763         |  |  |  |  |  |  |  |  |  | 23075763         |  |  |  |  |  |  |  |  |  | 23075763         |  |  |  |  |  |  |  |  |  |
|          |  |  |  |  |  |  |  |  |  | 14419757         |  |  |  |  |  |  |  |  |  | 14419757         |  |  |  |  |  |  |  |  |  | 14419757         |  |  |  |  |  |  |  |  |  |
|          |  |  |  |  |  |  |  |  |  | 8100880 PF2874   |  |  |  |  |  |  |  |  |  | 8100880 PF2874   |  |  |  |  |  |  |  |  |  | 8100880 PF2874   |  |  |  |  |  |  |  |  |  |
|          |  |  |  |  |  |  |  |  |  | 15224251 S826    |  |  |  |  |  |  |  |  |  | 15224251 S826    |  |  |  |  |  |  |  |  |  | 15224251 S826    |  |  |  |  |  |  |  |  |  |
|          |  |  |  |  |  |  |  |  |  | 15241213 CTY3484 |  |  |  |  |  |  |  |  |  | 15241213 CTY3484 |  |  |  |  |  |  |  |  |  | 15241213 CTY3484 |  |  |  |  |  |  |  |  |  |
|          |  |  |  |  |  |  |  |  |  | 23752201         |  |  |  |  |  |  |  |  |  | 23752201         |  |  |  |  |  |  |  |  |  | 23752201         |  |  |  |  |  |  |  |  |  |
|          |  |  |  |  |  |  |  |  |  | 15810962         |  |  |  |  |  |  |  |  |  | 15810962         |  |  |  |  |  |  |  |  |  | 15810962         |  |  |  |  |  |  |  |  |  |
|          |  |  |  |  |  |  |  |  |  | 14360849         |  |  |  |  |  |  |  |  |  | 14360849         |  |  |  |  |  |  |  |  |  | 14360849         |  |  |  |  |  |  |  |  |  |
|          |  |  |  |  |  |  |  |  |  | 14360850         |  |  |  |  |  |  |  |  |  | 14360850         |  |  |  |  |  |  |  |  |  | 14360850         |  |  |  |  |  |  |  |  |  |
|          |  |  |  |  |  |  |  |  |  | 6107911          |  |  |  |  |  |  |  |  |  | 6107911          |  |  |  |  |  |  |  |  |  | 6107911          |  |  |  |  |  |  |  |  |  |
|          |  |  |  |  |  |  |  |  |  | 8752982          |  |  |  |  |  |  |  |  |  | 8752982          |  |  |  |  |  |  |  |  |  | 8752982          |  |  |  |  |  |  |  |  |  |
|          |  |  |  |  |  |  |  |  |  | 22174538         |  |  |  |  |  |  |  |  |  | 22174538         |  |  |  |  |  |  |  |  |  | 22174538         |  |  |  |  |  |  |  |  |  |
|          |  |  |  |  |  |  |  |  |  | Kazakh 9         |  |  |  |  |  |  |  |  |  | Kazakh 9         |  |  |  |  |  |  |  |  |  | Kazakh 9         |  |  |  |  |  |  |  |  |  |
|          |  |  |  |  |  |  |  |  |  | 23081087         |  |  |  |  |  |  |  |  |  | 23081087         |  |  |  |  |  |  |  |  |  | 23081087         |  |  |  |  |  |  |  |  |  |
|          |  |  |  |  |  |  |  |  |  | 23526483         |  |  |  |  |  |  |  |  |  | 23526483         |  |  |  |  |  |  |  |  |  | 23526483         |  |  |  |  |  |  |  |  |  |
|          |  |  |  |  |  |  |  |  |  | 8203767          |  |  |  |  |  |  |  |  |  | 8203767          |  |  |  |  |  |  |  |  |  | 8203767          |  |  |  |  |  |  |  |  |  |
|          |  |  |  |  |  |  |  |  |  | 9118441          |  |  |  |  |  |  |  |  |  | 9118441          |  |  |  |  |  |  |  |  |  | 9118441          |  |  |  |  |  |  |  |  |  |
|          |  |  |  |  |  |  |  |  |  | 16199256         |  |  |  |  |  |  |  |  |  | 16199256         |  |  |  |  |  |  |  |  |  | 16199256         |  |  |  |  |  |  |  |  |  |
|          |  |  |  |  |  |  |  |  |  | 16265908         |  |  |  |  |  |  |  |  |  | 16265908         |  |  |  |  |  |  |  |  |  | 16265908         |  |  |  |  |  |  |  |  |  |
|          |  |  |  |  |  |  |  |  |  | 14950835         |  |  |  |  |  |  |  |  |  | 14950835         |  |  |  |  |  |  |  |  |  | 14950835         |  |  |  |  |  |  |  |  |  |
|          |  |  |  |  |  |  |  |  |  | 23241217         |  |  |  |  |  |  |  |  |  | 23241217         |  |  |  |  |  |  |  |  |  | 23241217         |  |  |  |  |  |  |  |  |  |
|          |  |  |  |  |  |  |  |  |  | 18674530         |  |  |  |  |  |  |  |  |  | 18674530         |  |  |  |  |  |  |  |  |  | 18674530         |  |  |  |  |  |  |  |  |  |
|          |  |  |  |  |  |  |  |  |  | 23503050         |  |  |  |  |  |  |  |  |  | 23503050         |  |  |  |  |  |  |  |  |  | 23503050         |  |  |  |  |  |  |  |  |  |
|          |  |  |  |  |  |  |  |  |  | 22923651         |  |  |  |  |  |  |  |  |  | 22923651         |  |  |  |  |  |  |  |  |  | 22923651         |  |  |  |  |  |  |  |  |  |
|          |  |  |  |  |  |  |  |  |  | 18721811         |  |  |  |  |  |  |  |  |  | 18721811         |  |  |  |  |  |  |  |  |  | 18721811         |  |  |  |  |  |  |  |  |  |
|          |  |  |  |  |  |  |  |  |  | Kazakh 5         |  |  |  |  |  |  |  |  |  | Kazakh 5         |  |  |  |  |  |  |  |  |  | Kazakh 5         |  |  |  |  |  |  |  |  |  |
|          |  |  |  |  |  |  |  |  |  | Kazakh 1         |  |  |  |  |  |  |  |  |  | Kazakh 1         |  |  |  |  |  |  |  |  |  | Kazakh 1         |  |  |  |  |  |  |  |  |  |
|          |  |  |  |  |  |  |  |  |  | Kazakh 2         |  |  |  |  |  |  |  |  |  | Kazakh 2         |  |  |  |  |  |  |  |  |  | Kazakh 2         |  |  |  |  |  |  |  |  |  |
|          |  |  |  |  |  |  |  |  |  | Kazakh 3         |  |  |  |  |  |  |  |  |  | Kazakh 3         |  |  |  |  |  |  |  |  |  | Kazakh 3         |  |  |  |  |  |  |  |  |  |
|          |  |  |  |  |  |  |  |  |  | Kazakh 4         |  |  |  |  |  |  |  |  |  | Kazakh 4         |  |  |  |  |  |  |  |  |  | Kazakh 4         |  |  |  |  |  |  |  |  |  |
|          |  |  |  |  |  |  |  |  |  | Kazakh 6         |  |  |  |  |  |  |  |  |  | Kazakh 6         |  |  |  |  |  |  |  |  |  | Kazakh 6         |  |  |  |  |  |  |  |  |  |
|          |  |  |  |  |  |  |  |  |  | Kazakh 7         |  |  |  |  |  |  |  |  |  | Kazakh 7         |  |  |  |  |  |  |  |  |  | Kazakh 7         |  |  |  |  |  |  |  |  |  |
|          |  |  |  |  |  |  |  |  |  | Kazakh 8         |  |  |  |  |  |  |  |  |  | Kazakh 8         |  |  |  |  |  |  |  |  |  | Kazakh 8         |  |  |  |  |  |  |  |  |  |
|          |  |  |  |  |  |  |  |  |  | Kazakh 9         |  |  |  |  |  |  |  |  |  | Kazakh 9         |  |  |  |  |  |  |  |  |  | Kazakh 9         |  |  |  |  |  |  |  |  |  |
|          |  |  |  |  |  |  |  |  |  | Kazakh 10        |  |  |  |  |  |  |  |  |  | Kazakh 10        |  |  |  |  |  |  |  |  |  | Kazakh 10        |  |  |  |  |  |  |  |  |  |
|          |  |  |  |  |  |  |  |  |  | Kazakh 11        |  |  |  |  |  |  |  |  |  | Kazakh 11        |  |  |  |  |  |  |  |  |  | Kazakh 11        |  |  |  |  |  |  |  |  |  |
|          |  |  |  |  |  |  |  |  |  | Kazakh 12        |  |  |  |  |  |  |  |  |  | Kazakh 12        |  |  |  |  |  |  |  |  |  | Kazakh 12        |  |  |  |  |  |  |  |  |  |
|          |  |  |  |  |  |  |  |  |  | Kazakh 13        |  |  |  |  |  |  |  |  |  | Kazakh 13        |  |  |  |  |  |  |  |  |  | Kazakh 13        |  |  |  |  |  |  |  |  |  |
|          |  |  |  |  |  |  |  |  |  | Kazakh 14        |  |  |  |  |  |  |  |  |  | Kazakh 14        |  |  |  |  |  |  |  |  |  | Kazakh 14        |  |  |  |  |  |  |  |  |  |
|          |  |  |  |  |  |  |  |  |  | Kazakh 15        |  |  |  |  |  |  |  |  |  | Kazakh 15        |  |  |  |  |  |  |  |  |  | Kazakh 15        |  |  |  |  |  |  |  |  |  |
|          |  |  |  |  |  |  |  |  |  | Kazakh 16        |  |  |  |  |  |  |  |  |  | Kazakh 16        |  |  |  |  |  |  |  |  |  | Kazakh 16        |  |  |  |  |  |  |  |  |  |
|          |  |  |  |  |  |  |  |  |  | Kazakh 17        |  |  |  |  |  |  |  |  |  | Kazakh 17        |  |  |  |  |  |  |  |  |  | Kazakh 17        |  |  |  |  |  |  |  |  |  |
|          |  |  |  |  |  |  |  |  |  | Kazakh 18        |  |  |  |  |  |  |  |  |  | Kazakh 18        |  |  |  |  |  |  |  |  |  | Kazakh 18        |  |  |  |  |  |  |  |  |  |
|          |  |  |  |  |  |  |  |  |  | Kazakh 19        |  |  |  |  |  |  |  |  |  | Kazakh 19        |  |  |  |  |  |  |  |  |  | Kazakh 19        |  |  |  |  |  |  |  |  |  |
|          |  |  |  |  |  |  |  |  |  | Kazakh 20        |  |  |  |  |  |  |  |  |  | Kazakh 20        |  |  |  |  |  |  |  |  |  | Kazakh 20        |  |  |  |  |  |  |  |  |  |
|          |  |  |  |  |  |  |  |  |  | Kazakh 21        |  |  |  |  |  |  |  |  |  | Kazakh 21        |  |  |  |  |  |  |  |  |  | Kazakh 21        |  |  |  |  |  |  |  |  |  |
|          |  |  |  |  |  |  |  |  |  | Kazakh 22        |  |  |  |  |  |  |  |  |  | Kazakh 22        |  |  |  |  |  |  |  |  |  | Kazakh 22        |  |  |  |  |  |  |  |  |  |
|          |  |  |  |  |  |  |  |  |  | Kazakh 23        |  |  |  |  |  |  |  |  |  | Kazakh 23        |  |  |  |  |  |  |  |  |  | Kazakh 23        |  |  |  |  |  |  |  |  |  |
|          |  |  |  |  |  |  |  |  |  | Kazakh 24        |  |  |  |  |  |  |  |  |  | Kazakh 24        |  |  |  |  |  |  |  |  |  | Kazakh 24        |  |  |  |  |  |  |  |  |  |
|          |  |  |  |  |  |  |  |  |  | Kazakh 25        |  |  |  |  |  |  |  |  |  | Kazakh 25        |  |  |  |  |  |  |  |  |  | Kazakh 25        |  |  |  |  |  |  |  |  |  |
|          |  |  |  |  |  |  |  |  |  | Kazakh 26        |  |  |  |  |  |  |  |  |  | Kazakh 26        |  |  |  |  |  |  |  |  |  | Kazakh 26        |  |  |  |  |  |  |  |  |  |
|          |  |  |  |  |  |  |  |  |  | Kazakh 27        |  |  |  |  |  |  |  |  |  | Kazakh 27        |  |  |  |  |  |  |  |  |  | Kazakh 27        |  |  |  |  |  |  |  |  |  |
|          |  |  |  |  |  |  |  |  |  | Kazakh 28        |  |  |  |  |  |  |  |  |  | Kazakh 28        |  |  |  |  |  |  |  |  |  | Kazakh 28        |  |  |  |  |  |  |  |  |  |
|          |  |  |  |  |  |  |  |  |  | Kazakh 29        |  |  |  |  |  |  |  |  |  | Kazakh 29        |  |  |  |  |  |  |  |  |  | Kazakh 29        |  |  |  |  |  |  |  |  |  |
|          |  |  |  |  |  |  |  |  |  | Kazakh 30        |  |  |  |  |  |  |  |  |  | Kazakh 30        |  |  |  |  |  |  |  |  |  | Kazakh 30        |  |  |  |  |  |  |  |  |  |
|          |  |  |  |  |  |  |  |  |  | Kazakh 31        |  |  |  |  |  |  |  |  |  | Kazakh 31        |  |  |  |  |  |  |  |  |  | Kazakh 31        |  |  |  |  |  |  |  |  |  |
|          |  |  |  |  |  |  |  |  |  | Kazakh 32        |  |  |  |  |  |  |  |  |  | Kazakh 32        |  |  |  |  |  |  |  |  |  | Kazakh 32        |  |  |  |  |  |  |  |  |  |
|          |  |  |  |  |  |  |  |  |  | Kazakh 33        |  |  |  |  |  |  |  |  |  | Kazakh 33        |  |  |  |  |  |  |  |  |  | Kazakh 33        |  |  |  |  |  |  |  |  |  |
|          |  |  |  |  |  |  |  |  |  | Kazakh 34        |  |  |  |  |  |  |  |  |  | Kazakh 34        |  |  |  |  |  |  |  |  |  | Kazakh 34        |  |  |  |  |  |  |  |  |  |
|          |  |  |  |  |  |  |  |  |  | Kazakh 35        |  |  |  |  |  |  |  |  |  | Kazakh 35        |  |  |  |  |  |  |  |  |  | Kazakh 35        |  |  |  |  |  |  |  |  |  |
|          |  |  |  |  |  |  |  |  |  | Kazakh 36        |  |  |  |  |  |  |  |  |  | Kazakh 36        |  |  |  |  |  |  |  |  |  | Kazakh 36        |  |  |  |  |  |  |  |  |  |
|          |  |  |  |  |  |  |  |  |  | Kazakh 37        |  |  |  |  |  |  |  |  |  | Kazakh 37        |  |  |  |  |  |  |  |  |  | Kazakh 37        |  |  |  |  |  |  |  |  |  |
|          |  |  |  |  |  |  |  |  |  | Kazakh 38        |  |  |  |  |  |  |  |  |  | Kazakh 38        |  |  |  |  |  |  |  |  |  | Kazakh 38        |  |  |  |  |  |  |  |  |  |
|          |  |  |  |  |  |  |  |  |  | Kazakh 39        |  |  |  |  |  |  |  |  |  | Kazakh 39        |  |  |  |  |  |  |  |  |  | Kazakh 39        |  |  |  |  |  |  |  |  |  |
|          |  |  |  |  |  |  |  |  |  | Kazakh 40        |  |  |  |  |  |  |  |  |  | Kazakh 40        |  |  |  |  |  |  |  |  |  | Kazakh 40        |  |  |  |  |  |  |  |  |  |
|          |  |  |  |  |  |  |  |  |  | Kazakh 41        |  |  |  |  |  |  |  |  |  | Kazakh 41        |  |  |  |  |  |  |  |  |  | Kazakh 41        |  |  |  |  |  |  |  |  |  |
|          |  |  |  |  |  |  |  |  |  | Kazakh 42        |  |  |  |  |  |  |  |  |  | Kazakh 42        |  |  |  |  |  |  |  |  |  | Kazakh 42        |  |  |  |  |  |  |  |  |  |
|          |  |  |  |  |  |  |  |  |  | Kazakh 43        |  |  |  |  |  |  |  |  |  | Kazakh 43        |  |  |  |  |  |  |  |  |  | Kazakh 43        |  |  |  |  |  |  |  |  |  |
|          |  |  |  |  |  |  |  |  |  | Kazakh 44        |  |  |  |  |  |  |  |  |  | Kazakh 44        |  |  |  |  |  |  |  |  |  | Kazakh 44        |  |  |  |  |  |  |  |  |  |
|          |  |  |  |  |  |  |  |  |  | Kazakh 45        |  |  |  |  |  |  |  |  |  | Kazakh 45        |  |  |  |  |  |  |  |  |  | Kazakh 45        |  |  |  |  |  |  |  |  |  |
|          |  |  |  |  |  |  |  |  |  | Kazakh 46        |  |  |  |  |  |  |  |  |  | Kazakh 46        |  |  |  |  |  |  |  |  |  | Kazakh 46        |  |  |  |  |  |  |  |  |  |
|          |  |  |  |  |  |  |  |  |  | Kazakh 47        |  |  |  |  |  |  |  |  |  | Kazakh 47        |  |  |  |  |  |  |  |  |  | Kazakh 47        |  |  |  |  |  |  |  |  |  |
|          |  |  |  |  |  |  |  |  |  | Kazakh 48        |  |  |  |  |  |  |  |  |  | Kazakh 48        |  |  |  |  |  |  |  |  |  | Kazakh 48        |  |  |  |  |  |  |  |  |  |
|          |  |  |  |  |  |  |  |  |  | Kazakh 49        |  |  |  |  |  |  |  |  |  | Kazakh 49        |  |  |  |  |  |  |  |  |  | Kazakh 49        |  |  |  |  |  |  |  |  |  |
|          |  |  |  |  |  |  |  |  |  | Kazakh 50        |  |  |  |  |  |  |  |  |  | Kazakh 50        |  |  |  |  |  |  |  |  |  | Kazakh 50        |  |  |  |  |  |  |  |  |  |
|          |  |  |  |  |  |  |  |  |  | Kazakh 51        |  |  |  |  |  |  |  |  |  | Kazakh 51        |  |  |  |  |  |  |  |  |  | Kazakh 51        |  |  |  |  |  |  |  |  |  |
|          |  |  |  |  |  |  |  |  |  | Kazakh 52        |  |  |  |  |  |  |  |  |  | Kazakh 52        |  |  |  |  |  |  |  |  |  | Kazakh 52        |  |  |  |  |  |  |  |  |  |
|          |  |  |  |  |  |  |  |  |  | Kazakh 53        |  |  |  |  |  |  |  |  |  | Kazakh 53        |  |  |  |  |  |  |  |  |  | Kazakh 53        |  |  |  |  |  |  |  |  |  |
|          |  |  |  |  |  |  |  |  |  | Kazakh 54        |  |  |  |  |  |  |  |  |  | Kazakh 54        |  |  |  |  |  |  |  |  |  | Kazakh 54        |  |  |  |  |  |  |  |  |  |
|          |  |  |  |  |  |  |  |  |  | Kazakh 55        |  |  |  |  |  |  |  |  |  | Kazakh 55        |  |  |  |  |  |  |  |  |  | Kazakh 55        |  |  |  |  |  |  |  |  |  |
|          |  |  |  |  |  |  |  |  |  | Kazakh 56        |  |  |  |  |  |  |  |  |  | Kazakh 56        |  |  |  |  |  |  |  |  |  | Kazakh 56        |  |  |  |  |  |  |  |  |  |
|          |  |  |  |  |  |  |  |  |  | Kazakh 57        |  |  |  |  |  |  |  |  |  | Kazakh 57        |  |  |  |  |  |  |  |  |  | Kazakh 57        |  |  |  |  |  |  |  |  |  |
|          |  |  |  |  |  |  |  |  |  | Kazakh 58        |  |  |  |  |  |  |  |  |  | Kazakh 58        |  |  |  |  |  |  |  |  |  | Kazakh 58        |  |  |  |  |  |  |  |  |  |
|          |  |  |  |  |  |  |  |  |  | Kazakh 59        |  |  |  |  |  |  |  |  |  | Kazakh 59        |  |  |  |  |  |  |  |  |  | Kazakh 59        |  |  |  |  |  |  |  |  |  |
|          |  |  |  |  |  |  |  |  |  | Kazakh 60        |  |  |  |  |  |  |  |  |  | Kazakh 60        |  |  |  |  |  |  |  |  |  | Kazakh 60        |  |  |  |  |  |  |  |  |  |
|          |  |  |  |  |  |  |  |  |  | Kazakh 61        |  |  |  |  |  |  |  |  |  | Kazakh 61        |  |  |  |  |  |  |  |  |  | Kazakh 61        |  |  |  |  |  |  |  |  |  |
|          |  |  |  |  |  |  |  |  |  | Kazakh 62        |  |  |  |  |  |  |  |  |  | Kazakh 62        |  |  |  |  |  |  |  |  |  | Kazakh 62        |  |  |  |  |  |  |  |  |  |
|          |  |  |  |  |  |  |  |  |  | Kazakh 63        |  |  |  |  |  |  |  |  |  | Kazakh 63        |  |  |  |  |  |  |  |  |  | Kazakh 63        |  |  |  |  |  |  |  |  |  |
|          |  |  |  |  |  |  |  |  |  | Kazakh 64        |  |  |  |  |  |  |  |  |  | Kazakh 64        |  |  |  |  |  |  |  |  |  | Kazakh 64        |  |  |  |  |  |  |  |  |  |
|          |  |  |  |  |  |  |  |  |  | Kazakh 65        |  |  |  |  |  |  |  |  |  | Kazakh 65        |  |  |  |  |  |  |  |  |  | Kazakh 65        |  |  |  |  |  |  |  |  |  |
|          |  |  |  |  |  |  |  |  |  | Kazakh 66        |  |  |  |  |  |  |  |  |  | Kazakh 66        |  |  |  |  |  |  |  |  |  | Kazakh 66        |  |  |  |  |  |  |  |  |  |
|          |  |  |  |  |  |  |  |  |  | Kazakh 67        |  |  |  |  |  |  |  |  |  | Kazakh 67        |  |  |  |  |  |  |  |  |  | Kazakh 67        |  |  |  |  |  |  |  |  |  |
|          |  |  |  |  |  |  |  |  |  | Kazakh 68        |  |  |  |  |  |  |  |  |  | Kazakh 68        |  |  |  |  |  |  |  |  |  | Kazakh 68        |  |  |  |  |  |  |  |  |  |
|          |  |  |  |  |  |  |  |  |  | Kazakh 69        |  |  |  |  |  |  |  |  |  | Kazakh 69        |  |  |  |  |  |  |  |  |  | Kazakh 69        |  |  |  |  |  |  |  |  |  |
|          |  |  |  |  |  |  |  |  |  | Kazakh 70        |  |  |  |  |  |  |  |  |  | Kazakh 70        |  |  |  |  |  |  |  |  |  | Kazakh 70        |  |  |  |  |  |  |  |  |  |
|          |  |  |  |  |  |  |  |  |  | Kazakh 71        |  |  |  |  |  |  |  |  |  | Kazakh 71        |  |  |  |  |  |  |  |  |  | Kazakh 71        |  |  |  |  |  |  |  |  |  |
|          |  |  |  |  |  |  |  |  |  | Kazakh 72        |  |  |  |  |  |  |  |  |  | Kazakh 72        |  |  |  |  |  |  |  |  |  | Kazakh 72        |  |  |  |  |  |  |  |  |  |
|          |  |  |  |  |  |  |  |  |  | Kazakh 73        |  |  |  |  |  |  |  |  |  | Kazakh 73        |  |  |  |  |  |  |  |  |  | Kazakh 73        |  |  |  |  |  |  |  |  |  |
|          |  |  |  |  |  |  |  |  |  | Kazakh 74        |  |  |  |  |  |  |  |  |  | Kazakh 74        |  |  |  |  |  |  |  |  |  | Kazakh 74        |  |  |  |  |  |  |  |  |  |
|          |  |  |  |  |  |  |  |  |  | Kazakh 75        |  |  |  |  |  |  |  |  |  | Kazakh 75        |  |  |  |  |  |  |  |  |  | Kazakh 75        |  |  |  |  |  |  |  |  |  |
|          |  |  |  |  |  |  |  |  |  | Kazakh 76        |  |  |  |  |  |  |  |  |  | Kazakh 76        |  |  |  |  |  |  |  |  |  | Kazakh 76        |  |  |  |  |  |  |  |  |  |
|          |  |  |  |  |  |  |  |  |  | Kazakh 77        |  |  |  |  |  |  |  |  |  | Kazakh 77        |  |  |  |  |  |  |  |  |  | Kazakh 77        |  |  |  |  |  |  |  |  |  |
|          |  |  |  |  |  |  |  |  |  | Kazakh 78        |  |  |  |  |  |  |  |  |  | Kazakh 78        |  |  |  |  |  |  |  |  |  | Kazakh 78        |  |  |  |  |  |  |  |  |  |
|          |  |  |  |  |  |  |  |  |  | Kazakh 79        |  |  |  |  |  |  |  |  |  | Kazakh 79        |  |  |  |  |  |  |  |  |  | Kazakh 79        |  |  |  |  |  |  |  |  |  |
|          |  |  |  |  |  |  |  |  |  | Kazakh 80        |  |  |  |  |  |  |  |  |  | Kazakh 80        |  |  |  |  |  |  |  |  |  | Kazakh 80        |  |  |  |  |  |  |  |  |  |
|          |  |  |  |  |  |  |  |  |  | Kazakh 81        |  |  |  |  |  |  |  |  |  | Kazakh 81        |  |  |  |  |  |  |  |  |  | Kazakh 81        |  |  |  |  |  |  |  |  |  |
|          |  |  |  |  |  |  |  |  |  | Kazakh 82        |  |  |  |  |  |  |  |  |  | Kazakh 82        |  |  |  |  |  |  |  |  |  | Kazakh 82        |  |  |  |  |  |  |  |  |  |
|          |  |  |  |  |  |  |  |  |  | Kazakh 83        |  |  |  |  |  |  |  |  |  | Kazakh 83        |  |  |  |  |  |  |  |  |  | Kazakh 83        |  |  |  |  |  |  |  |  |  |
|          |  |  |  |  |  |  |  |  |  | Kazakh 84        |  |  |  |  |  |  |  |  |  | Kazakh 84        |  |  |  |  |  |  |  |  |  | Kazakh 84        |  |  |  |  |  |  |  |  |  |
|          |  |  |  |  |  |  |  |  |  | Kazakh 85        |  |  |  |  |  |  |  |  |  | Kazakh 85        |  |  |  |  |  |  |  |  |  | Kazakh 85        |  |  |  |  |  |  |  |  |  |
|          |  |  |  |  |  |  |  |  |  | Kazakh 86        |  |  |  |  |  |  |  |  |  | Kazakh 86        |  |  |  |  |  |  |  |  |  | Kazakh 86        |  |  |  |  |  |  |  |  |  |
|          |  |  |  |  |  |  |  |  |  | Kazakh 87        |  |  |  |  |  |  |  |  |  | Kazakh 87        |  |  |  |  |  |  |  |  |  | Kazakh 87        |  |  |  |  |  |  |  |  |  |
|          |  |  |  |  |  |  |  |  |  | Kazakh 88        |  |  |  |  |  |  |  |  |  | Kazakh 88        |  |  |  |  |  |  |  |  |  | Kazakh 88        |  |  |  |  |  |  |  |  |  |
|          |  |  |  |  |  |  |  |  |  | Kazakh 89        |  |  |  |  |  |  |  |  |  | Kazakh 89        |  |  |  |  |  |  |  |  |  | Kazakh 89        |  |  |  |  |  |  |  |  |  |
|          |  |  |  |  |  |  |  |  |  | Kazakh 90        |  |  |  |  |  |  |  |  |  | Kazakh 90        |  |  |  |  |  |  |  |  |  | Kazakh 90        |  |  |  |  |  |  |  |  |  |
|          |  |  |  |  |  |  |  |  |  | Kazakh 91        |  |  |  |  |  |  |  |  |  | Kazakh 91        |  |  |  |  |  |  |  |  |  | Kazakh 91        |  |  |  |  |  |  |  |  |  |
|          |  |  |  |  |  |  |  |  |  | Kazakh 92        |  |  |  |  |  |  |  |  |  | Kazakh 92        |  |  |  |  |  |  |  |  |  | Kazakh 92        |  |  |  |  |  |  |  |  |  |
|          |  |  |  |  |  |  |  |  |  | Kazakh 93        |  |  |  |  |  |  |  |  |  | Kazakh 93        |  |  |  |  |  |  |  |  |  | Kazakh 93        |  |  |  |  |  |  |  |  |  |
|          |  |  |  |  |  |  |  |  |  | Kazakh 94        |  |  |  |  |  |  |  |  |  | Kazakh 94        |  |  |  |  |  |  |  |  |  | Kazakh 94        |  |  |  |  |  |  |  |  |  |
|          |  |  |  |  |  |  |  |  |  | Kazakh 95        |  |  |  |  |  |  |  |  |  | Kazakh 95        |  |  |  |  |  |  |  |  |  | Kazakh 95        |  |  |  |  |  |  |  |  |  |
|          |  |  |  |  |  |  |  |  |  | Kazakh 96        |  |  |  |  |  |  |  |  |  | Kazakh 96        |  |  |  |  |  |  |  |  |  | Kazakh 96        |  |  |  |  |  |  |  |  |  |
|          |  |  |  |  |  |  |  |  |  | Kazakh 97        |  |  |  |  |  |  |  |  |  | Kazakh 97        |  |  |  |  |  |  |  |  |  | Kazakh 97        |  |  |  |  |  |  |  |  |  |
|          |  |  |  |  |  |  |  |  |  | Kazakh 98        |  |  |  |  |  |  |  |  |  | Kazakh 98        |  |  |  |  |  |  |  |  |  | Kazakh 98        |  |  |  |  |  |  |  |  |  |
|          |  |  |  |  |  |  |  |  |  | Kazakh 99        |  |  |  |  |  |  |  |  |  | Kazakh 99        |  |  |  |  |  |  |  |  |  | Kazakh 99        |  |  |  |  |  |  |  |  |  |
|          |  |  |  |  |  |  |  |  |  | Kazakh 100       |  |  |  |  |  |  |  |  |  | Kazakh 100       |  |  |  |  |  |  |  |  |  | Kazakh 100       |  |  |  |  |  |  |  |  |  |
|          |  |  |  |  |  |  |  |  |  |                  |  |  |  |  |  |  |  |  |  |                  |  |  |  |  |  |  |  |  |  |                  |  |  |  |  |  |  |  |  |  |
